# Supplementary material for: Snowfall in the Alps: Evaluation and projections based on the EURO-CORDEX regional climate models
Source: Copernicus journal article supplement (doi:10.5194/tc-2017-7), 2017-02-27
Supplement: Supplementary file 1 [file tc-2017-7-supplement.pdf]

# Snowfall in the Alps: Evaluation and projections based on the EURO-CORDEX regional climate models

Prisco Frei<sup>1</sup>, Sven Kotlarski<sup>2,\*</sup>, Mark A. Liniger<sup>2</sup>, Christoph Schär<sup>1</sup>

<sup>1</sup> Institute for Atmospheric and Climate Sciences, ETH Zurich, 8006, Zurich, Switzerland

<sup>2</sup> Federal Office of Meteorology and Climatology, MeteoSwiss, 8058 Zurich-Airport, Switzerland

\* Corresponding author: [sven.kotlarski@meteoswiss.ch](mailto:sven.kotlarski@meteoswiss.ch)

## - Supplementary Material -

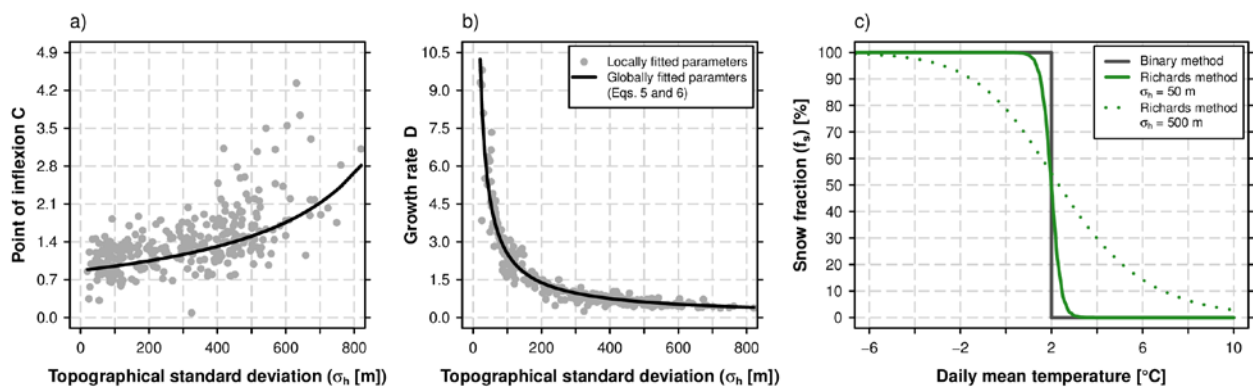

**Figure S1** a) and b) Expressing the point of inflexion C and the growth rate D of the Richards equation as a function of the subgrid topographical standard deviation. Grey circles: Fitted parameters for each grid cell in the Swiss domain. Black line: Global fit. c) Example for deriving the daily snow fraction  $sf$  based on the binary method with a snow fractionation temperature  $T = 2^\circ\text{C}$  (gray line) and based on the Richards method assuming subgrid topographical standard deviations of 50 m (solid green line) and 500 m (dotted green line).

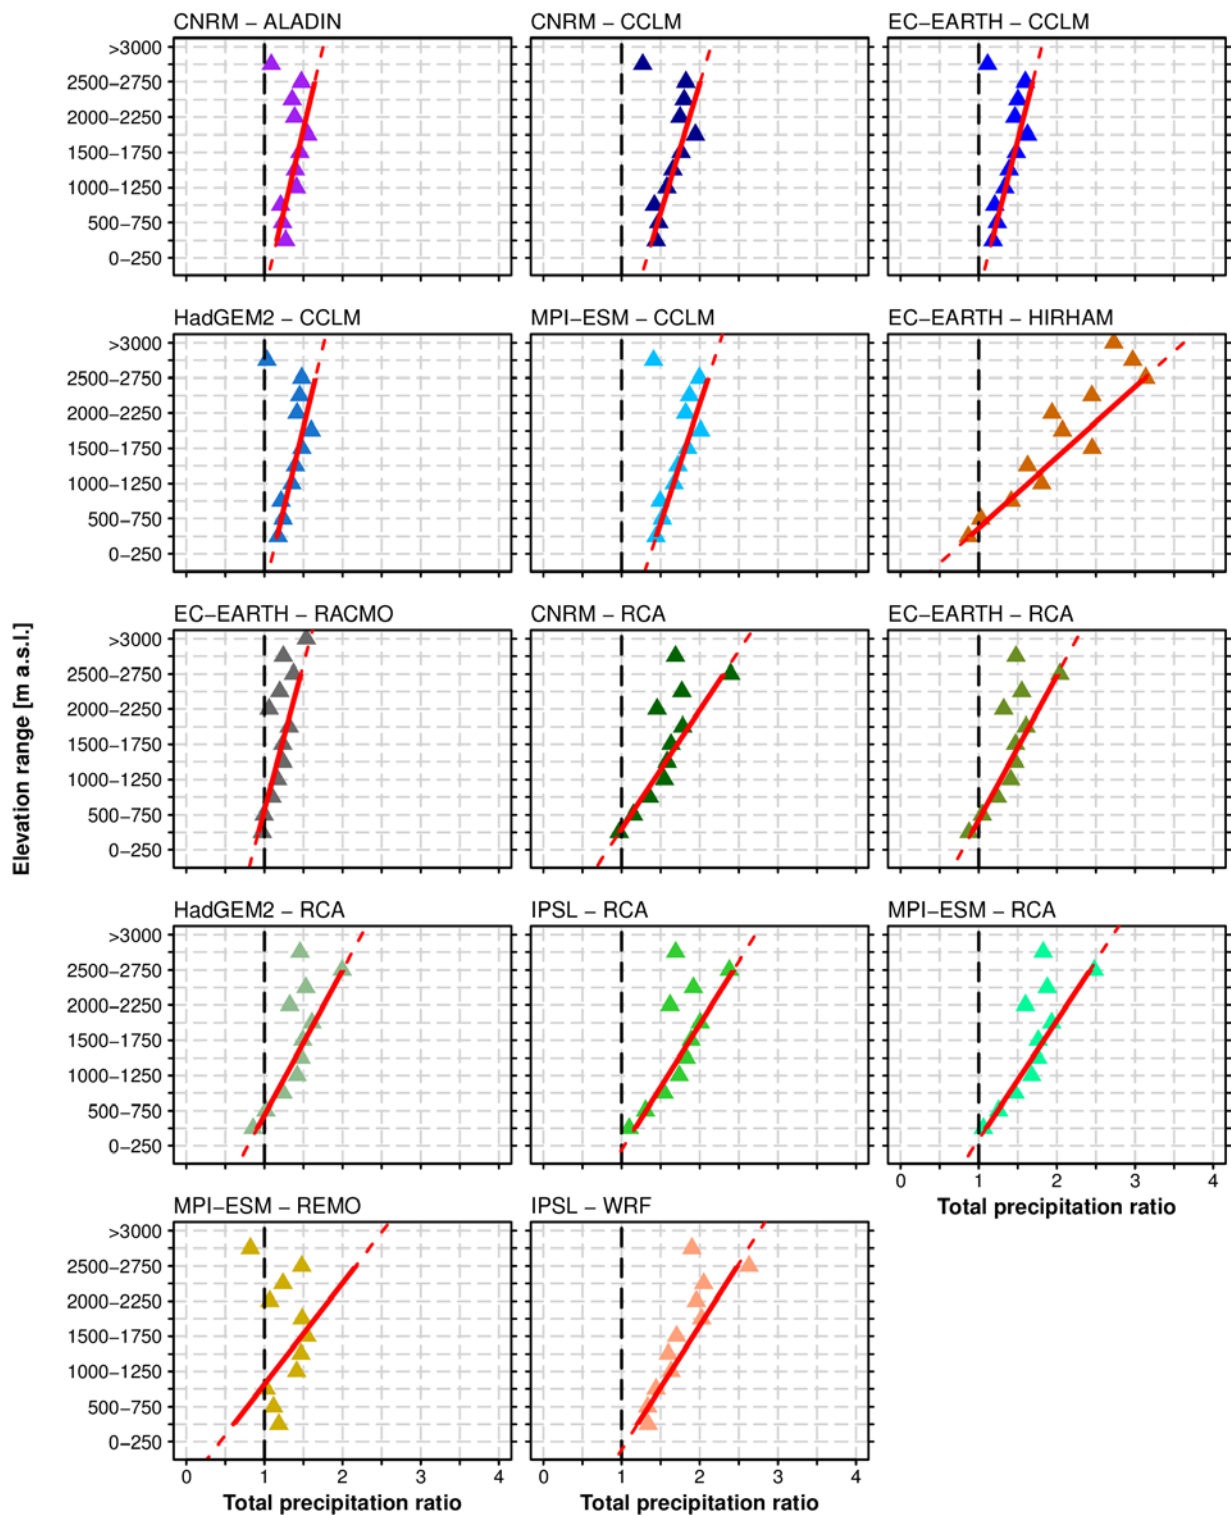

**Figure S2:** Ratios (RCM simulations divided by observational analysis) of total precipitation sums from September to May in 1971 - 2005 vs. elevation for the Swiss domain. The linear regression line, applied to the ratios for elevations between 250 m a.s.l. and 2750 m a.s.l., is represented by the red line.

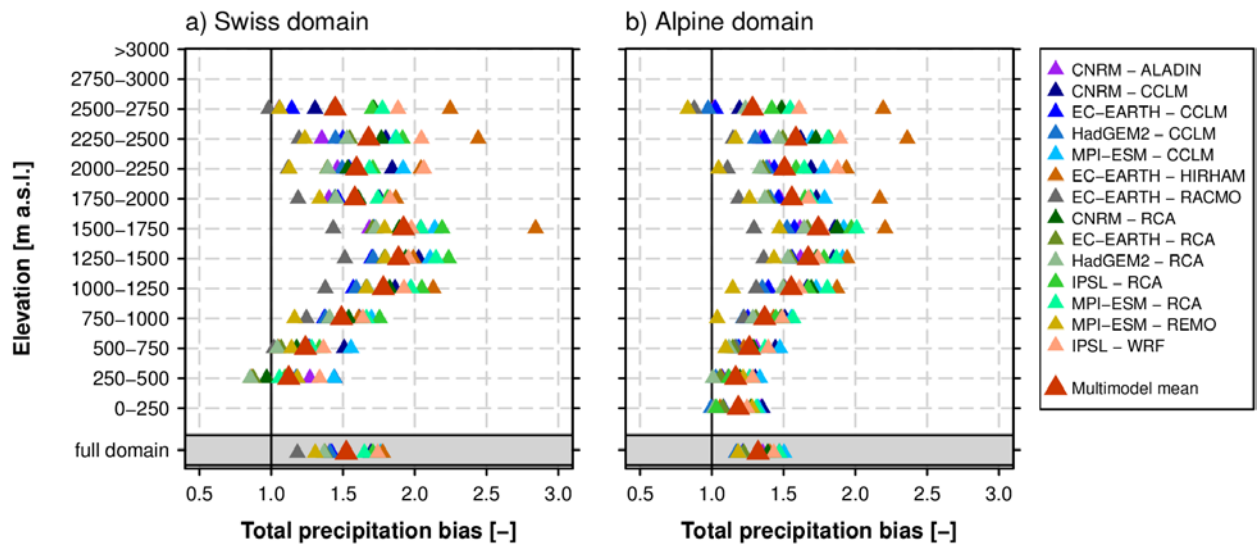

**Figure S3:** Total winter (SEP-MAY) precipitation bias (expressed as quotient between RCM simulations and observations) in the EVAL period 1971-2005 for individual elevation intervals and for the full domain (lowermost row). Left panel: Swiss domain only. Right panel: Entire Alpine analysis domain (cf. Fig. 1). Observational reference: EOBS version 13.1 (Haylock et al., 2008) on  $0.22^\circ$  interpolated to the  $0.11^\circ$  RCM grid by nearest neighbour interpolation.

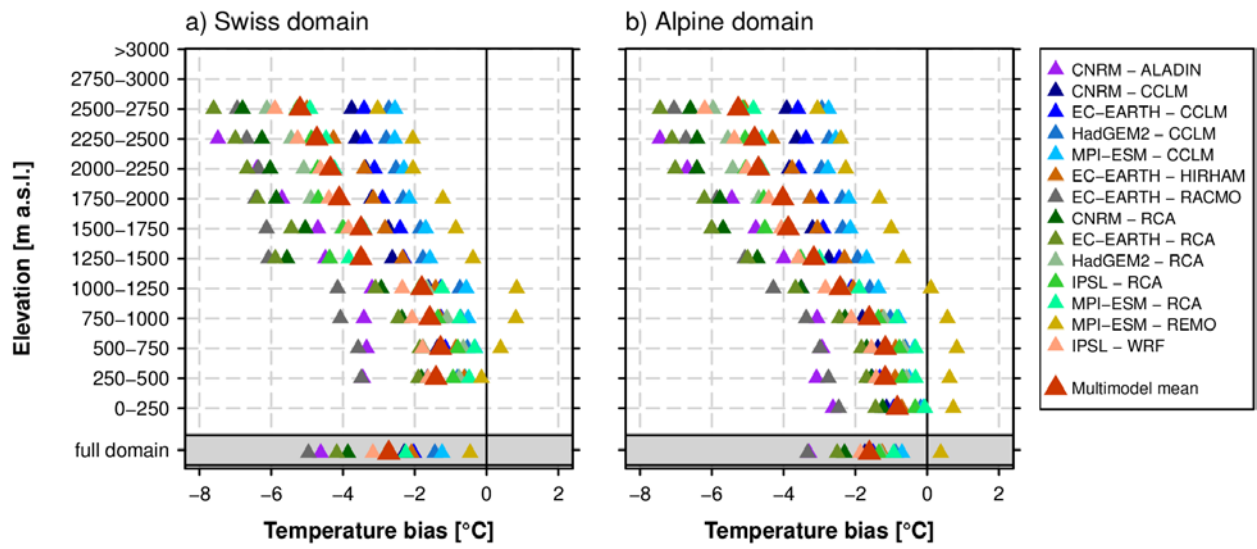

Figure S4: As Figure S3 but for the winter (SEP-MAY) temperature bias.

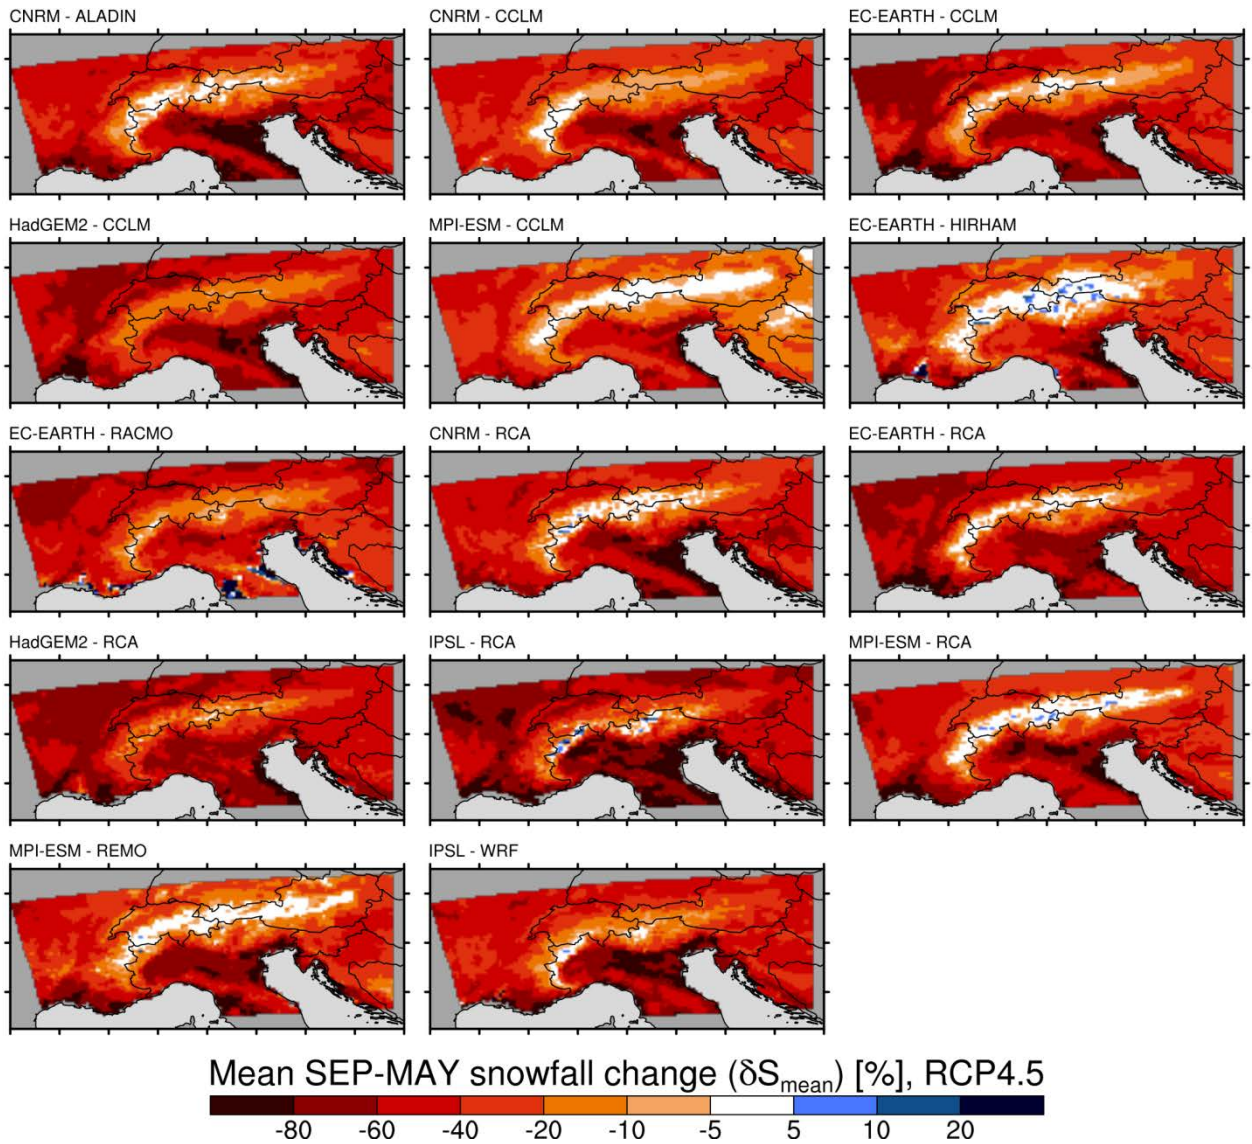

**Figure S5** Spatial distribution of relative changes (SCEN period 2070-2099 with respect to CTRL period 1981-2010) in mean September-May snowfall,  $\delta S_{\text{mean}}$ , for RCP4.5 and for the 14 snowfall separated + bias corrected RCM simulations ( $\text{RCM}_{\text{sep+bc}}$ ).



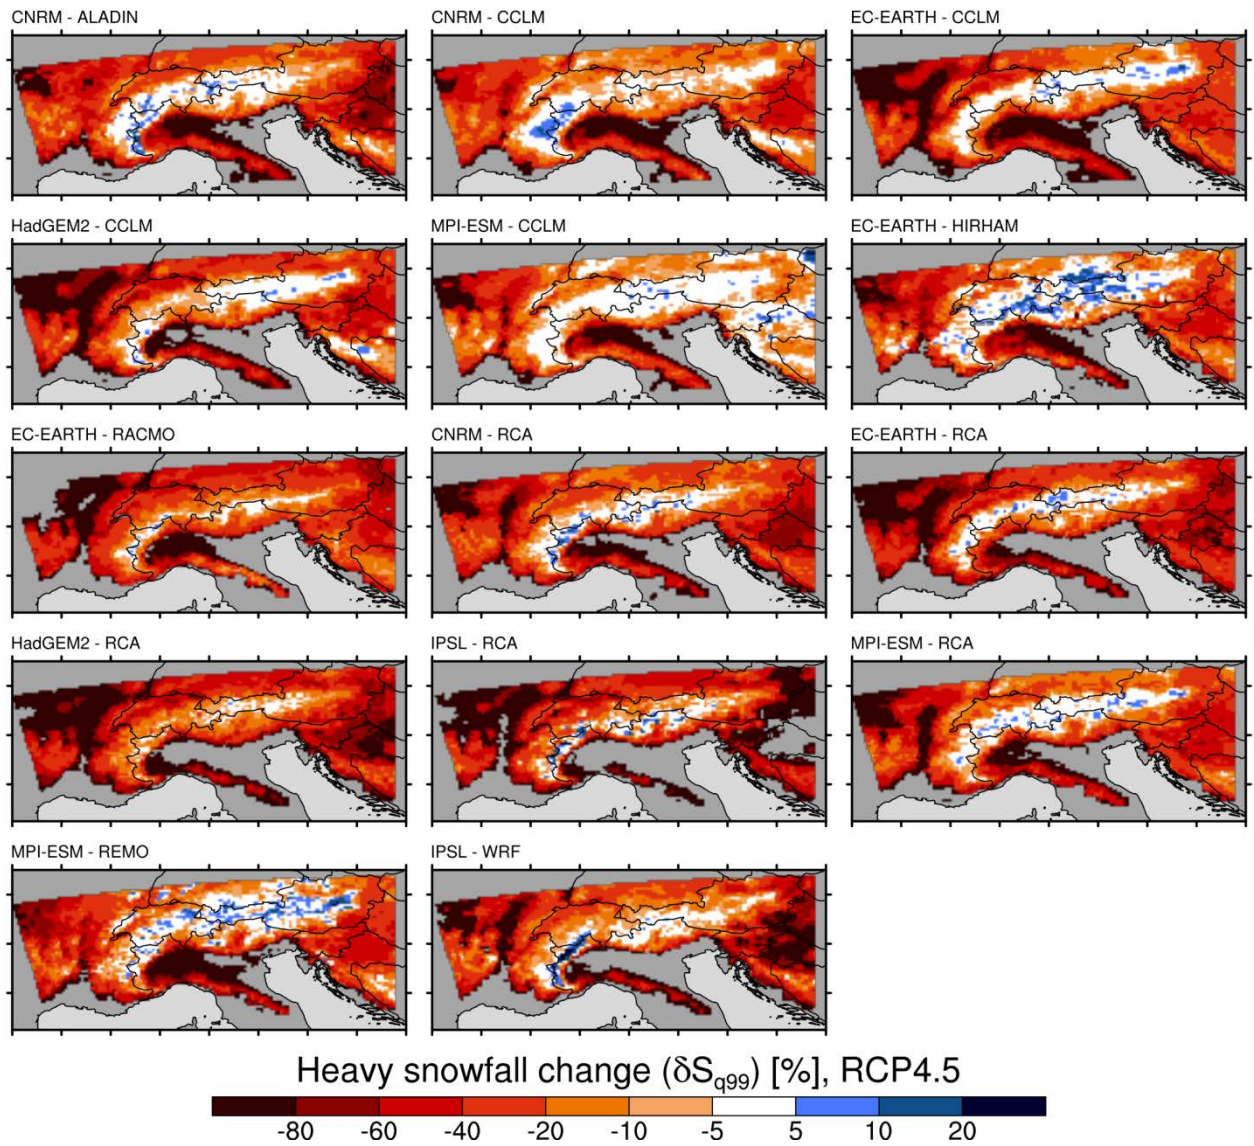

**Figure S6** Spatial distribution of relative changes (SCEN period 2070-2099 with respect to CTRL period 1981-2010) in heavy snowfall,  $\delta S_{q99}$ , for RCP4.5 and for the 14 snowfall separated + bias corrected RCM simulations ( $RCM_{sep+bc}$ ).

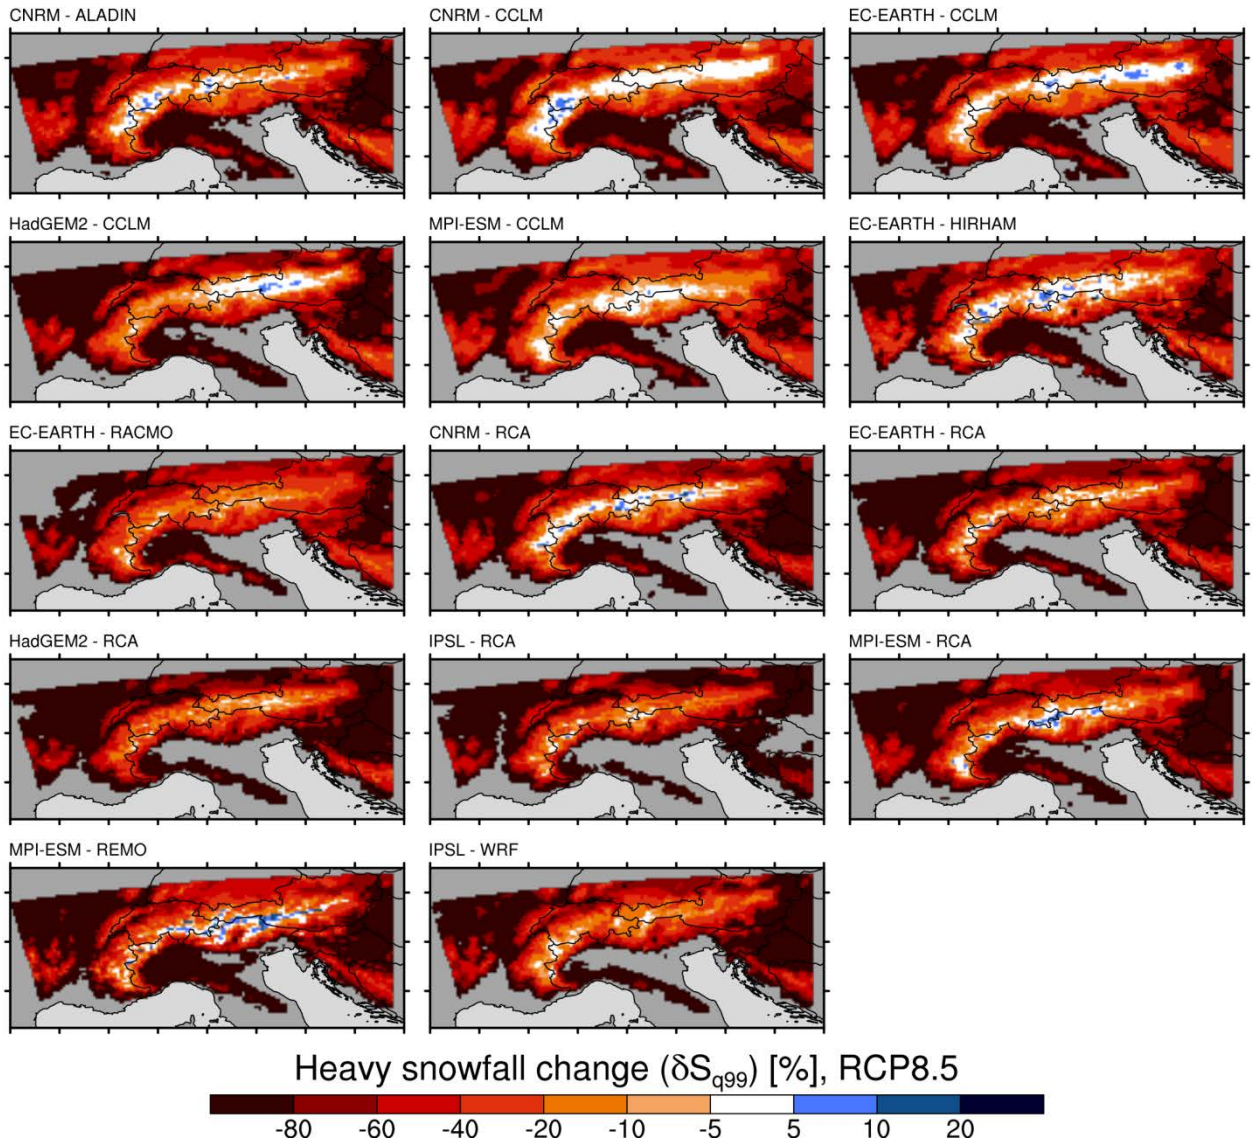

**Figure S7** Spatial distribution of relative changes (SCEN period 2070-2099 with respect to CTRL period 1981-2010) in heavy snowfall,  $\delta S_{q99}$ , for RCP8.5 and for the 14 snowfall separated + bias corrected RCM simulations ( $RCM_{sep+bc}$ ).

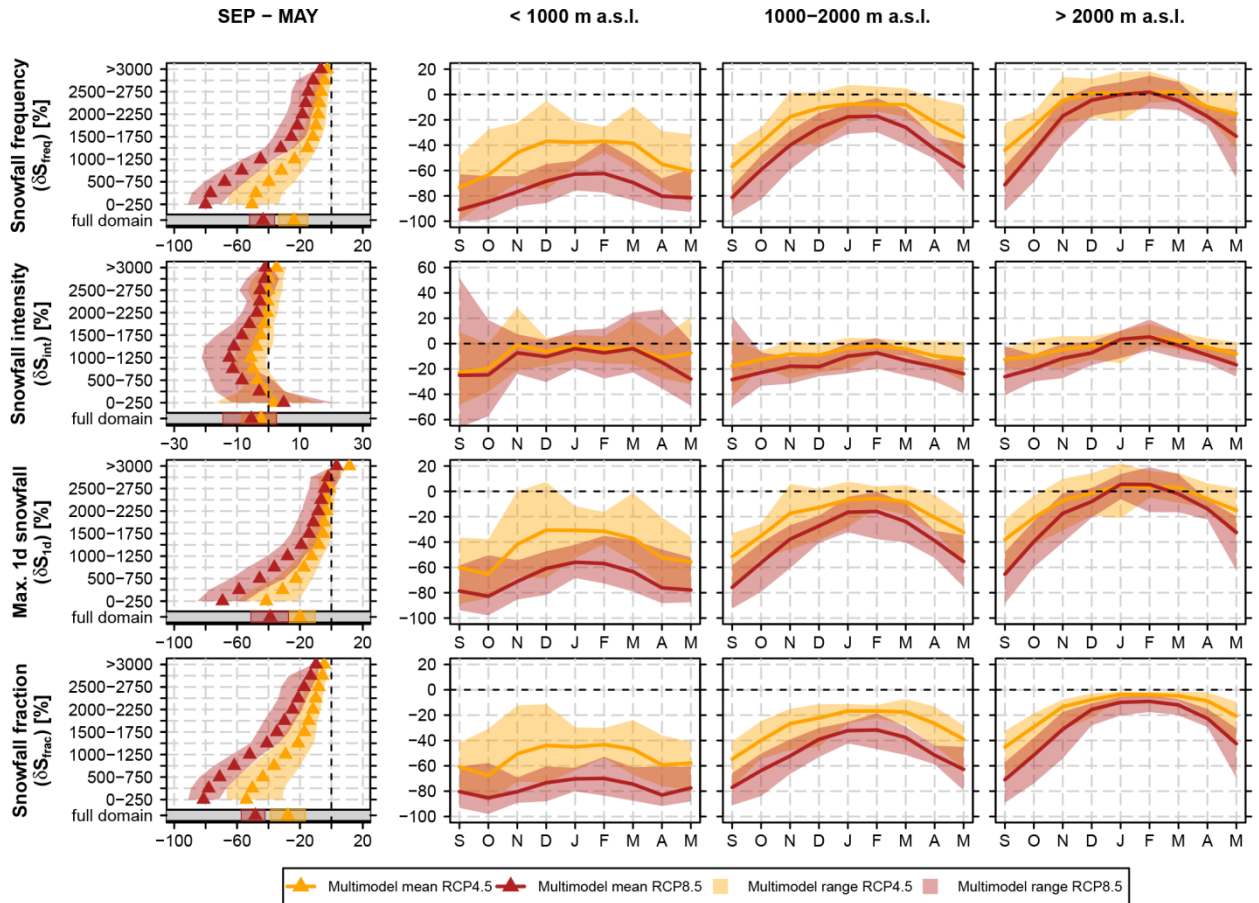

**Figure S8** Relative changes (SCEN period 2070-2099 with respect to CTRL period 1981-2010) of max. 1 day snowfall,  $\delta S_{1d}$ , snowfall frequency,  $\delta S_{freq}$ , snowfall intensity,  $\delta S_{int}$ , and snowfall fraction,  $\delta S_{frac}$ , based on the 14 snowfall separated + bias corrected (RCM<sub>sep+bc</sub>) RCM simulations for RCP4.5 and RCP8.5, each. The first column shows the mean September-May snowfall index statistics vs. elevation while monthly snowfall index changes (spatially averaged over the elevation intervals <1000 m.a.s.l., 1000 m a.s.l.-2000 m a.s.l. and >2000 m a.s.l.) are displayed in columns 2-4.
